# Supplementary material for: Combining native mass spectrometry and lipidomics to uncover specific membrane protein–lipid interactions from natural lipid sources
Source: Royal Society of Chemistry journal article supplement (doi:10.1039/d3sc01482g), 2023-01-01
Supplement: d3sc01482g1.pdf [file d3sc01482g1.pdf]

## Supplemental Information

### Combining Native Mass Spectrometry and Lipidomics to Uncover Specific Membrane Protein-Lipid Interactions from Natural Lipid Sources

**Yun Zhu,<sup>1,‡</sup> Melanie T. Odenkirk,<sup>2,‡</sup> Pei Qiao,<sup>1,‡</sup> Tianqi Zhang,<sup>1</sup> Samantha Schrecke,<sup>1</sup> Ming Zhou,<sup>3</sup> Michael T. Marty,<sup>4</sup> Erin S. Baker,<sup>5,\*</sup> Arthur Laganowsky<sup>1,\*</sup>**

<sup>1</sup> Department of Chemistry, Texas A&M University, College Station, TX 77843

<sup>2</sup> Department of Chemistry, North Carolina State University, Raleigh, NC 27695

<sup>3</sup> Verna and Marrs McLean Department of Biochemistry and Molecular Biology, Baylor College of Medicine, Houston, TX, 77030

<sup>4</sup> Department of Chemistry and Biochemistry, The University of Arizona, Tucson, AZ 85721

<sup>5</sup> Department of Chemistry, University of North Carolina, Chapel Hill, NC 27514

‡ These authors contributed equally to this work

\* Corresponding Authors: erinmsb@unc.edu and alaganowsky@chem.tamu.edu

## Supplemental Figures

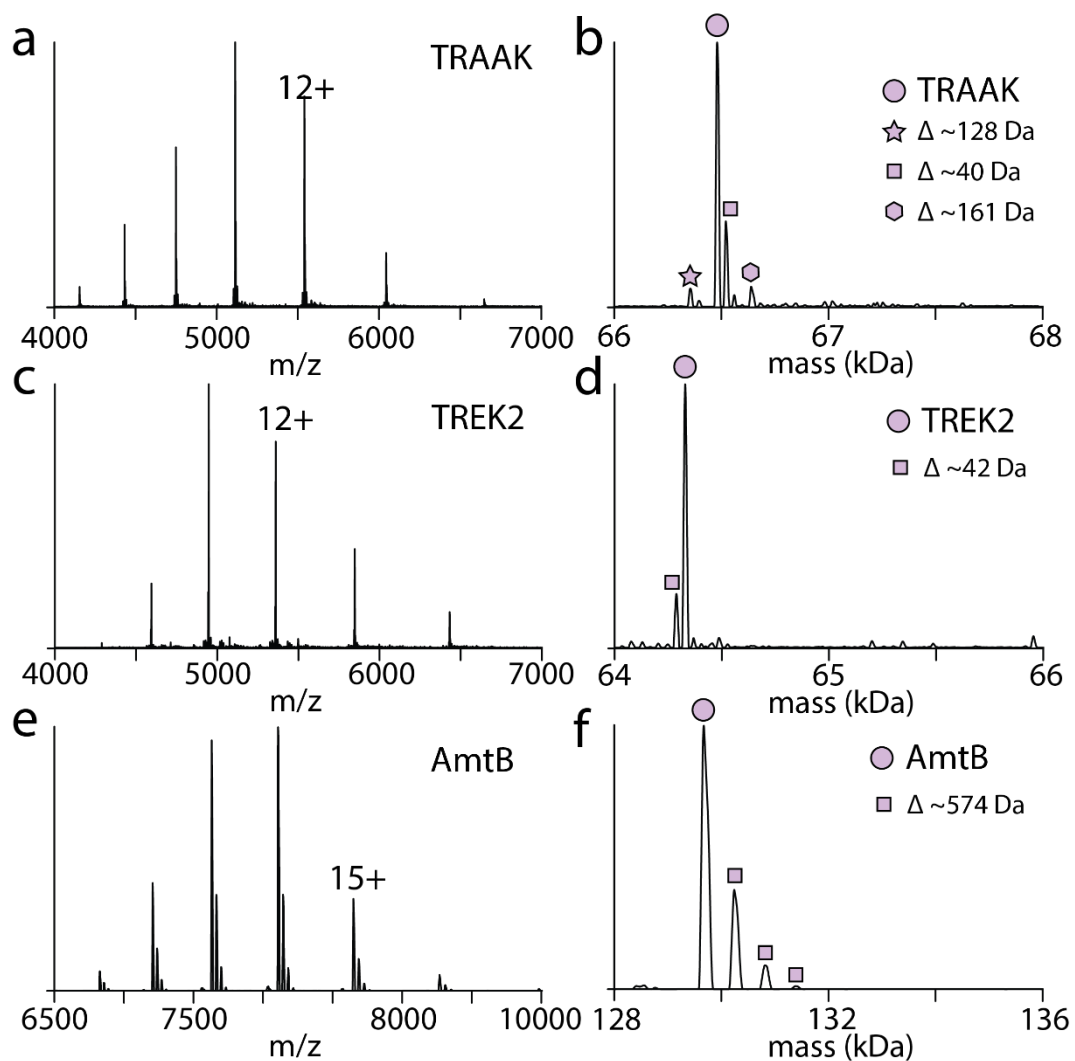

**Supplemental Figure S1. Native mass spectra of optimized membrane proteins devoid of any major contaminants.** Representative native mass spectra are shown (top to bottom) for TRAAK, TREK2, and AmtB. The deconvoluted mass spectra are shown to the right. For AmtB, a 574 Da mass addition is observed which corresponds to mis-cleavage of the pelB secretion sequence.

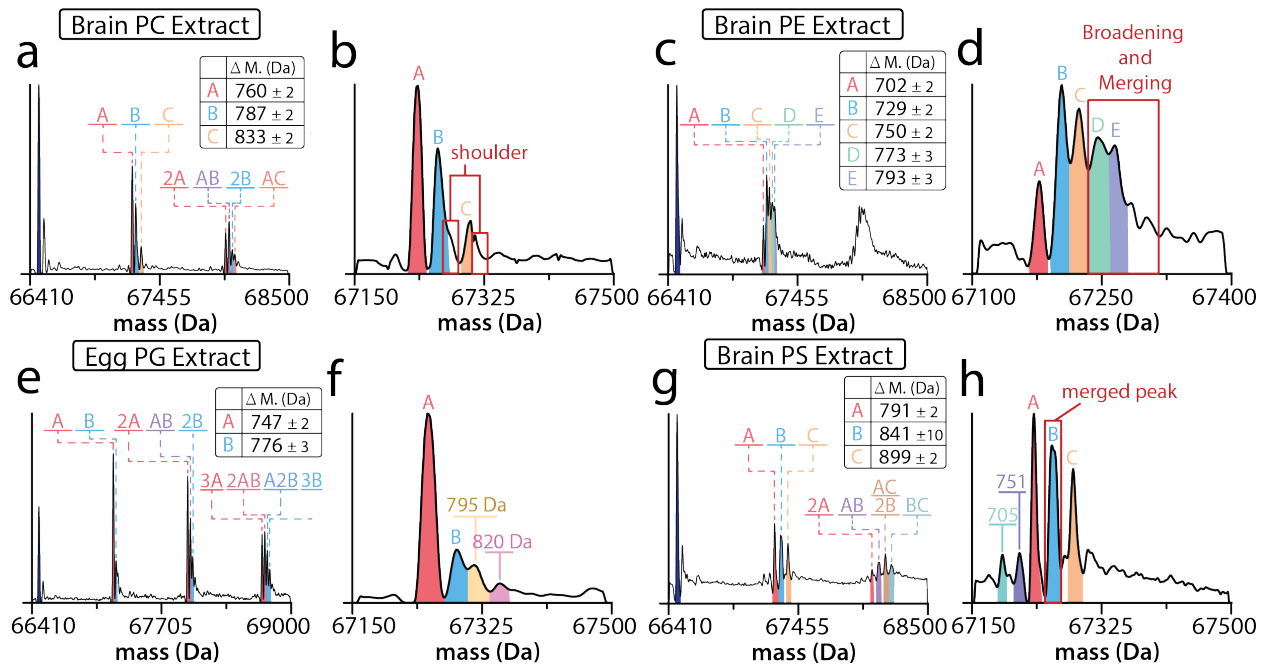

**Supplemental Figure S2. TRAAK enriches specific lipids from a series of natural headgroup extracts.** a) Deconvoluted spectrum of TRAAK mixed with a PC extract followed by a 2 CV wash. b) Zoom of the first ligand binding event. c) Deconvoluted spectrum of TRAAK mixed with a PE extract followed by a 2 CV wash. d) Zoom of the first ligand binding event. e) Deconvoluted spectrum of TRAAK mixed with a PG extract followed by a 2 CV wash. f) Zoom of the first ligand binding event. g) Deconvoluted spectrum of TRAAK mixed with a PS extract followed by a 2 CV wash. h) Zoom of the first ligand binding event.

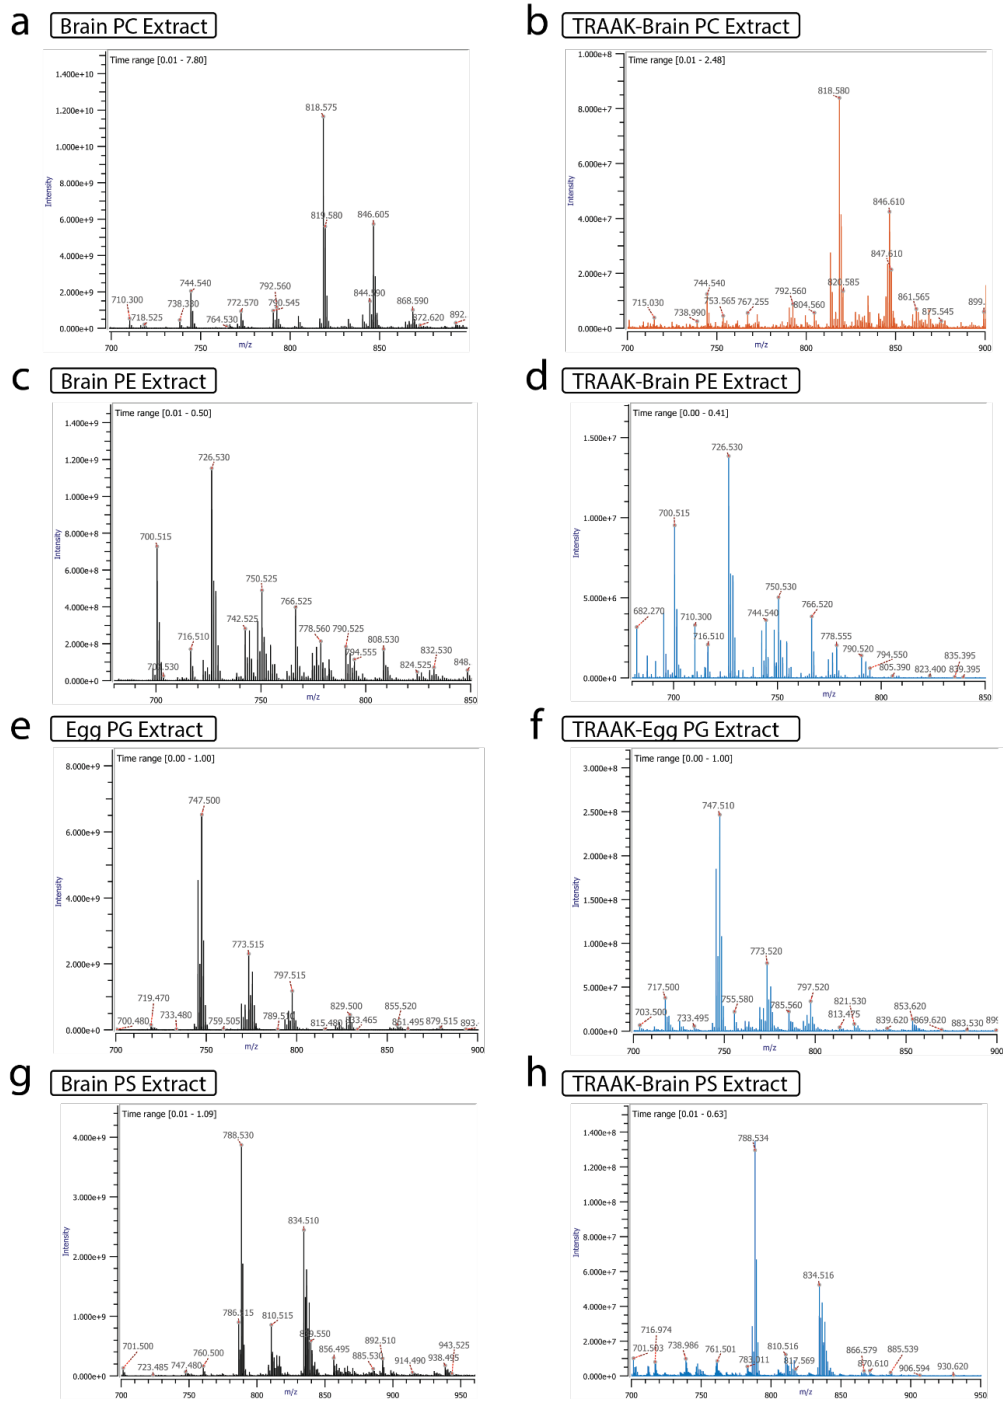

**Supplemental Figure S3. Negative mode mass spectra of natural headgroup extracts.** The type of headgroup extract is labeled.

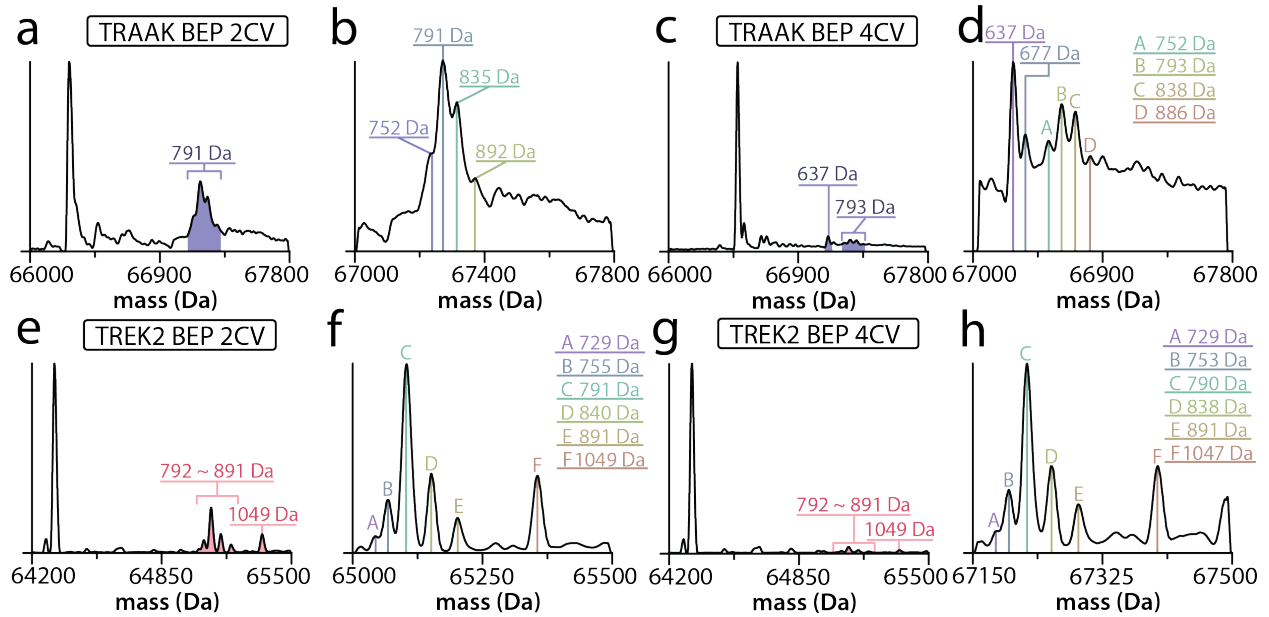

**Supplemental Figure S4. TRAAK and TREK2 enrich specific lipids from a brain polar lipid extract (BEP).** a) Deconvoluted spectrum of TRAAK mixed with a BEP extract followed by a 2 CV wash. b) Zoom of the first ligand binding event. c) Deconvoluted spectrum of TRAAK mixed with a BEP extract followed by a 4 CV wash. d) Zoom of the first ligand binding event. e) Deconvoluted spectrum of TREK2 mixed with a BEP extract followed by a 2 CV wash. f) Zoom of the first ligand binding event. g) Deconvoluted spectrum of TREK2 mixed with a BEP extract followed by a 4 CV wash. h) Zoom of the first ligand binding event.

**Supplemental Table S1. Phospholipids and their abbreviations used in this work.**

| <b><i>Abbreviation</i></b> | <b><i>Lipid Name</i></b>                           |
|----------------------------|----------------------------------------------------|
| PA                         | Phosphatidic acid                                  |
| LPA                        | Lyso phosphatidic acid                             |
| PC                         | Phosphatidylcholine                                |
| PC O/P                     | Phosphatidylcholine alkyl ether/plasmalogen        |
| LPC                        | Lyso phosphatidylcholine                           |
| PE                         | Phosphatidylethanolamine                           |
| PE O/P                     | Phosphatidylethanolamine alkyl ether/plasmalogen   |
| LPE                        | Lyso phosphatidylethanolamine                      |
| PG                         | Phosphatidylglycerol                               |
| LPG                        | Lyso phosphatidylglycerol                          |
| PI                         | Phosphatidylinositol                               |
| PS                         | Phosphatidylserine                                 |
| CDL                        | Cardiolipin                                        |
| EcPE                       | Phosphatidylethanolamine ( <i>E. coli</i> Extract) |
| EcCDL                      | Cardiolipin ( <i>E. coli</i> Extract)              |
| BEP                        | Brain Extract Polar (from Porcine)                 |
| ANA                        | Anandamide                                         |
| FFA                        | Free fatty acid                                    |
| Cer                        | Ceramide                                           |
| HexCer                     | Hexosyl Ceramide                                   |
| SM                         | Sphingomyelin                                      |
| AC                         | Acylcarnitine                                      |
| TG                         | Triacylglycerol                                    |
| DG                         | Diacylglycerol                                     |

Supplemental Table S2.

| <i>Elution Gradient</i> |              |              |                           |
|-------------------------|--------------|--------------|---------------------------|
| <i>Time (min)</i>       | <i>% MPA</i> | <i>% MPB</i> | <i>Flow rate (mL/min)</i> |
| 0                       | 60           | 40           | 0.25                      |
| 2                       | 50           | 50           | 0.25                      |
| 3                       | 40           | 60           | 0.25                      |
| 12                      | 30           | 70           | 0.25                      |
| 15                      | 25           | 75           | 0.25                      |
| 17                      | 22           | 78           | 0.25                      |
| 19                      | 15           | 85           | 0.25                      |
| 22                      | 8            | 92           | 0.25                      |
| 25                      | 1            | 99           | 0.25                      |
| 34                      | 1            | 99           | 0.25                      |

Supplemental Table S3.

| <i>Column wash</i> |              |              |                           |
|--------------------|--------------|--------------|---------------------------|
| <i>Time (min)</i>  | <i>% MPA</i> | <i>% MPB</i> | <i>Flow rate (mL/min)</i> |
| 34.5               | 60           | 40           | 0.3                       |
| 35                 | 1            | 99           | 0.3                       |
| 35.5               | 1            | 99           | 0.3                       |
| 36                 | 60           | 40           | 0.35                      |
| 37                 | 60           | 40           | 0.3                       |
| 38                 | 60           | 40           | 0.25                      |



Supplemental Table S4. Lipidomic analysis of AmtB lipid washes with EcCDL and EcPE.

| Class | Lipid         | Adduct | Precursor Mz | EPE Extract           |                       | ECDL Extract          |                       | ECDL EPE Mixture      |                       |
|-------|---------------|--------|--------------|-----------------------|-----------------------|-----------------------|-----------------------|-----------------------|-----------------------|
|       |               |        |              | Retention Time (min.) | Log <sub>2</sub> Area | Retention Time (min.) | Log <sub>2</sub> Area | Retention Time (min.) | Log <sub>2</sub> Area |
| PE    | PE(16:0_17:1) | [M-H]  | 702.5079     | 21.87                 | 20.164                |                       |                       | 21.79                 | 19.832                |
| PE    | PE(16:1_18:1) | [M-H]  | 714.5079     | 20.83                 | 17.896                |                       |                       | 20.74                 | 17.567                |
| PE    | PE(16:0_18:1) | [M-H]  | 716.5236     | 22.25                 | 20.619                |                       |                       | 22.16                 | 20.163                |
| PE    | PE(16:0_18:0) | [M-H]  | 718.5392     | 22.04                 | 16.192                |                       |                       | 21.91                 | 17.590                |
| PE    | PE(17:1_18:1) | [M-H]  | 728.5236     | 21.87                 | 17.967                |                       |                       | 21.79                 | 17.400                |
| PE    | PE(16:0_19:1) | [M-H]  | 730.5392     | 23.08                 | 16.597                |                       |                       | 23                    | 16.907                |
| PE    | PE(18:1/18:1) | [M-H]  | 742.5392     | 22.25                 | 19.995                |                       |                       | 22.16                 | 19.607                |
| PE    | PE(16:0_20:1) | [M-H]  | 744.5549     |                       |                       |                       |                       | 21.95                 | 16.121                |
| PE    | PE(18:0_18:1) | [M-H]  | 744.5549     | 23.42                 | 16.683                |                       |                       | 23.37                 | 17.916                |
| PE    | PE(18:0/18:0) | [M-H]  | 746.5705     | 23.29                 | 15.899                |                       |                       | 23.25                 | 16.952                |
| PE    | PE(18:1_19:1) | [M-H]  | 756.5549     |                       |                       |                       |                       | 23                    | 14.639                |
| PE    | PE(18:0_20:4) | [M-H]  | 766.5392     |                       |                       |                       |                       | 22.33                 | 16.873                |
| PE    | PE(16:0_22:4) | [M-H]  | 766.5392     | 22.37                 | 15.301                |                       |                       |                       |                       |
| PE    | PE(18:0_20:1) | [M-H]  | 772.5862     |                       |                       |                       |                       | 23.2                  | 15.788                |
| PE    | PE(16:0_22:1) | [M-H]  | 772.5862     |                       |                       |                       |                       | 23.2                  | 15.469                |
| PE    | PE(20:1_20:4) | [M-H]  | 792.5549     |                       |                       |                       |                       | 22.75                 | 16.244                |
| PE    | PE(18:1_22:4) | [M-H]  | 792.5549     |                       |                       |                       |                       | 22.75                 | 16.321                |
| PE    | PE(18:0_22:5) | [M-H]  | 792.5549     |                       |                       |                       |                       | 22.75                 | 16.252                |
| PE    | PE(18:1_22:3) | [M-H]  | 794.5705     |                       |                       |                       |                       | 23.08                 | 15.816                |
| PE    | PE(18:0_22:4) | [M-H]  | 794.5705     |                       |                       |                       |                       | 23.08                 | 15.816                |
| CDL   | CDL(62:1)     | [M-H]  | 1321.918     |                       |                       |                       |                       | 25.37                 | 14.141                |
| CDL   | CDL(64:2)     | [M-H]  | 1347.934     |                       |                       | 25.36                 | 15.351                | 25.33                 | 18.128                |
| CDL   | CDL(64:1)     | [M-H]  | 1349.949     |                       |                       |                       |                       | 25.79                 | 14.799                |
| CDL   | CDL(65:2)     | [M-H]  | 1361.949     |                       |                       | 25.7                  | 15.186                | 25.66                 | 17.311                |
| CDL   | CDL(66:3)     | [M-H]  | 1373.949     |                       |                       | 25.28                 | 13.237                | 25.33                 | 15.361                |
| CDL   | CDL(66:2)     | [M-H]  | 1375.965     |                       |                       | 25.78                 | 17.256                | 25.75                 | 17.963                |
| CDL   | CDL(67:3)     | [M-H]  | 1387.965     |                       |                       |                       |                       | 25.62                 | 14.504                |
| CDL   | CDL(67:2)     | [M-H]  | 1389.981     |                       |                       | 26.11                 | 13.434                | 26.08                 | 15.752                |

|     |           |       |          |  |  |  |  |       |        |
|-----|-----------|-------|----------|--|--|--|--|-------|--------|
| CDL | CDL(68:3) | [M-H] | 1401.981 |  |  |  |  | 25.71 | 15.200 |
|-----|-----------|-------|----------|--|--|--|--|-------|--------|

**Supplemental Table S5. Lipidomic analysis of TRAAK lipid enrichment with brain PC extracts.**

| <b>Class</b>  | <b>Lipid</b>                 | <b>m/z</b> | <b>Summed Area</b> | <b>Log<sub>2</sub>Area</b> | <b>Normalized Log<sub>2</sub>Area</b> |
|---------------|------------------------------|------------|--------------------|----------------------------|---------------------------------------|
| LPC           | LPC(0:0/16:0)                | 496.339766 | 13619              | 13.733                     | 0                                     |
|               | LPC(0:0/18:0)                | 524.371066 | 16438              | 14.005                     | 0.024                                 |
|               | LPC(18:1/0:0)                | 522.355416 | 26654              | 14.702                     | 0.087                                 |
|               | LPC(16:0/0:0)                | 496.339766 | 31966              | 14.964                     | 0.111                                 |
|               | LPC(0:0/18:1)                | 522.355416 | 46807              | 15.514                     | 0.16                                  |
| PC(P-)        | PC(P-18:0/18:1)              | 772.621467 | 173891             | 17.408                     | 0.33                                  |
|               | PC(P-18:0/18:2)              | 770.605817 | 432635             | 18.723                     | 0.448                                 |
|               | PC(P-18:0/16:0)              | 746.605817 | 1892388            | 20.852                     | 0.64                                  |
| PC            | PC(18:0_22:5)                | 836.616382 | 116319             | 16.828                     | 0.278                                 |
|               | PC(14:0_16:0)                | 706.538132 | 190031             | 17.536                     | 0.342                                 |
|               | PC(18:0_20:3)                | 812.616382 | 221070             | 17.754                     | 0.361                                 |
|               | PC(16:0_18:3)                | 756.553782 | 248918             | 17.925                     | 0.377                                 |
|               | PC(16:1_18:2)                | 756.553782 | 263722             | 18.009                     | 0.384                                 |
|               | PC(18:1_18:2)                | 784.585082 | 290829             | 18.15                      | 0.397                                 |
|               | PC(17:0_18:1)                | 774.600732 | 484196             | 18.885                     | 0.463                                 |
|               | PC(16:0_22:5);PC(18:0_20:5)  | 808.585082 | 495758             | 18.919                     | 0.466                                 |
|               | PC(18:0_22:4)                | 838.632032 | 604351             | 19.205                     | 0.492                                 |
|               | PC(18:0_20:1)                | 816.647682 | 666547             | 19.346                     | 0.504                                 |
|               | PC(14:0_18:1);PC(16:0_16:1)a | 732.553782 | 848099             | 19.694                     | 0.536                                 |
|               | PC(14:0_18:1);PC(16:0_16:1)b | 732.553782 | 881951             | 19.75                      | 0.541                                 |
|               | PC(16:0_18:2)                | 758.569432 | 909012             | 19.794                     | 0.545                                 |
|               | PC(18:0_18:2)                | 786.600732 | 1018864            | 19.959                     | 0.559                                 |
|               | PC(16:0_18:0)                | 762.600732 | 1143765            | 20.125                     | 0.574                                 |
|               | PC(16:0_22:6)                | 806.569432 | 1149495            | 20.133                     | 0.575                                 |
|               | PC(18:0_22:6)                | 834.600732 | 1265715            | 20.272                     | 0.587                                 |
|               | PC(18:2/18:2)                | 782.569432 | 2374642            | 21.179                     | 0.669                                 |
|               | PC(16:0/16:0)                | 734.569432 | 2700264            | 21.365                     | 0.686                                 |
|               | PC(18:0/18:0)                | 790.632032 | 3026006            | 21.529                     | 0.7                                   |
|               | PC(18:0_20:4)                | 810.600732 | 3560360            | 21.764                     | 0.722                                 |
| PC(18:1/18:1) | 786.600732                   | 4246839    | 22.018             | 0.744                      |                                       |
| PC(18:0_18:1) | 788.616382                   | 20125430   | 24.263             | 0.946                      |                                       |

|  |               |            |          |        |   |
|--|---------------|------------|----------|--------|---|
|  | PC(16:0_18:1) | 760.585082 | 30510232 | 24.863 | 1 |
|--|---------------|------------|----------|--------|---|

Supplemental Table S6. Lipidomic analysis of TRAAK lipid enrichment with brain PE extracts.

| <i>Class</i>  | <i>Lipid</i>                 | <i>m/z</i> | <i>Summed Area</i> | <i>Log<sub>2</sub>Area</i> | <i>Normalized Log<sub>2</sub>Area</i> |
|---------------|------------------------------|------------|--------------------|----------------------------|---------------------------------------|
| LPE           | LPE(0:0/18:1)                | 478.293914 | 18278              | 14.158                     | 0.079                                 |
|               | LPE(18:1/0:0)                | 478.293914 | 36185              | 15.143                     | 0.185                                 |
| PE            | PE(18:0_18:3)                | 740.52358  | 11018              | 13.428                     | 0                                     |
|               | PE(18:1_18:2)                | 740.52358  | 33483              | 15.031                     | 0.173                                 |
|               | PE(18:0_18:2)                | 742.53923  | 85518              | 16.384                     | 0.319                                 |
|               | PE(18:0_20:3)                | 768.55488  | 95902              | 16.549                     | 0.337                                 |
|               | PE(38:4)                     | 766.53923  | 130725             | 16.996                     | 0.386                                 |
|               | PE(16:0_22:5);PE(18:1_20:4)b | 764.52358  | 139778             | 17.093                     | 0.396                                 |
|               | PE(16:0_20:4);PE(18:2/18:2)  | 738.50793  | 140814             | 17.103                     | 0.397                                 |
|               | PE(16:0_22:5);PE(18:1_20:4)a | 764.52358  | 164629             | 17.329                     | 0.422                                 |
|               | PE(18:0_20:1)                | 772.58618  | 166772             | 17.348                     | 0.424                                 |
|               | PE(16:0_22:6)                | 762.50793  | 183927             | 17.489                     | 0.439                                 |
|               | PE(18:0_20:2)                | 770.57053  | 357476             | 18.447                     | 0.542                                 |
|               | PE(18:0_22:5)                | 792.55488  | 734053             | 19.486                     | 0.655                                 |
|               | PE(16:0_18:1)                | 716.52358  | 984289             | 19.909                     | 0.7                                   |
|               | PE(18:0_22:6)                | 790.53923  | 971234             | 19.889                     | 0.698                                 |
|               | PE(18:1/18:1)                | 742.53923  | 1237393            | 20.239                     | 0.736                                 |
|               | PE(18:0_20:4)                | 766.53923  | 1829531            | 20.803                     | 0.797                                 |
| PE(18:0_18:1) | 744.55488                    | 2381810    | 21.184             | 0.838                      |                                       |
| PE(O/P-)      | PE(P-16:0/20:3)              | 724.528665 | 62433              | 15.93                      | 0.27                                  |
|               | PE(P-16:0/18:2)              | 698.513015 | 106565             | 16.701                     | 0.354                                 |
|               | PE(P-18:0/22:5)a             | 776.559965 | 119352             | 16.865                     | 0.371                                 |
|               | PE(P-18:0/20:3)              | 752.559965 | 180906             | 17.465                     | 0.436                                 |
|               | PE(P-16:0/22:6)              | 746.513015 | 187111             | 17.514                     | 0.441                                 |
|               | PE(O-18:0/22:5)              | 778.575615 | 403258             | 18.621                     | 0.561                                 |
|               | PE(P-18:0/22:5)b             | 776.559965 | 495653             | 18.919                     | 0.593                                 |
|               | PE(P-16:0/20:4)              | 722.513015 | 516461             | 18.978                     | 0.6                                   |
|               | PE(O-18:0/22:6)              | 776.559965 | 802494             | 19.614                     | 0.668                                 |
|               | PE(P-16:0/22:4)              | 750.544315 | 1034992            | 19.981                     | 0.708                                 |

|  |                 |            |         |        |       |
|--|-----------------|------------|---------|--------|-------|
|  | PE(P-18:0/22:6) | 774.544315 | 1064576 | 20.022 | 0.713 |
|  | PE(P-16:0/22:5) | 748.528665 | 1476832 | 20.494 | 0.764 |
|  | PE(P-18:0/22:4) | 778.575615 | 1612762 | 20.621 | 0.777 |
|  | PE(P-18:0/20:2) | 754.575615 | 1884550 | 20.846 | 0.802 |
|  | PE(P-18:0/20:4) | 750.544315 | 2036414 | 20.958 | 0.814 |
|  | PE(P-16:0/18:1) | 700.528665 | 3183973 | 21.602 | 0.883 |
|  | PE(P-18:0/18:1) | 728.559965 | 3729310 | 21.83  | 0.908 |
|  | PE(P-16:0/20:2) | 726.544315 | 6731846 | 22.683 | 1     |

Supplemental Table S7. Lipidomic analysis of TRAAK lipid enrichment with egg PG extracts.

| <i>Class</i> | <i>Lipid</i>                | <i>m/z</i> | <i>Summed Area</i> | <i>Log<sub>2</sub>Area</i> | <i>Normalized Log<sub>2</sub>Area</i> |
|--------------|-----------------------------|------------|--------------------|----------------------------|---------------------------------------|
| PG           | PG(16:1_20:4)               | 767.48686  | 9673               | 13.24                      | 0                                     |
|              | PG(14:0_18:2)               | 717.47121  | 11869              | 13.535                     | 0.0297                                |
|              | PG(16:0_18:0)               | 749.53381  | 35596              | 15.119                     | 0.1893                                |
|              | PG(15:0_18:1)               | 733.50251  | 39948              | 15.286                     | 0.206                                 |
|              | PG(17:0_18:2)               | 759.51816  | 41189              | 15.33                      | 0.2105                                |
|              | PG(16:1_18:2)b              | 743.48686  | 41730              | 15.349                     | 0.2124                                |
|              | PG(18:0_18:3);PG(16:0_20:3) | 771.51816  | 45574              | 15.476                     | 0.2252                                |
|              | PG(18:0_20:2)               | 801.56511  | 56559              | 15.787                     | 0.2566                                |
|              | PG(18:0_22:4)               | 825.56511  | 58588              | 15.838                     | 0.2617                                |
|              | PG(16:0_19:1);PG(17:0_18:1) | 761.53381  | 72815              | 16.152                     | 0.2933                                |
|              | PG(16:0_22:4)               | 797.53381  | 74123              | 16.178                     | 0.2959                                |
|              | PG(16:0/16:0)               | 721.50251  | 77837              | 16.248                     | 0.303                                 |
|              | PG(16:1_18:2)a              | 743.48686  | 101964             | 16.638                     | 0.3422                                |
|              | PG(16:0_20:3)               | 771.51816  | 136247             | 17.056                     | 0.3843                                |
|              | PG(18:0_20:3)               | 799.54946  | 138054             | 17.075                     | 0.3862                                |
|              | PG(18:0_22:6)               | 821.53381  | 153922             | 17.232                     | 0.402                                 |
|              | PG(16:0_16:1)               | 719.48686  | 166759             | 17.347                     | 0.4137                                |
|              | PG(18:1_20:4)               | 795.51816  | 172497             | 17.396                     | 0.4186                                |
|              | PG(16:1_18:1)               | 745.50251  | 261601             | 17.997                     | 0.4791                                |
|              | PG(18:0_22:5)               | 823.54946  | 324421             | 18.308                     | 0.5103                                |
|              | PG(16:0_22:6)               | 793.50251  | 472866             | 18.851                     | 0.5651                                |
|              | PG(16:0_22:5)               | 795.51816  | 788285             | 19.588                     | 0.6393                                |
|              | PG(18:1_18:2)               | 771.51816  | 907989             | 19.792                     | 0.6599                                |
|              | PG(18:1/18:1)               | 773.53381  | 1129183            | 20.107                     | 0.6915                                |
|              | PG(16:0_20:4)               | 769.50251  | 1188622            | 20.181                     | 0.699                                 |
|              | PG(18:0_20:4)               | 797.53381  | 2284311            | 21.123                     | 0.7939                                |
|              | PG(18:0_18:2)               | 773.53381  | 3810375            | 21.862                     | 0.8682                                |
|              | PG(16:0_20:1)               | 775.54946  | 4146948            | 21.984                     | 0.8805                                |
|              | PG(16:0_18:2)               | 745.50251  | 6443933            | 22.62                      | 0.9446                                |
|              | PG(16:0_18:1)               | 747.51816  | 9437611            | 23.17                      | 1                                     |

**Supplemental Table S8. Lipidomic analysis of TRAAK lipid enrichment with brain PS extracts.**

| <i>Class</i>  | <i>Lipid</i>  | <i>m/z</i> | <i>Summed Area</i> | <i>Log<sub>2</sub>Area</i> | <i>Normalized Log<sub>2</sub>Area</i> |
|---------------|---------------|------------|--------------------|----------------------------|---------------------------------------|
| PS            | PS(18:1_20:4) | 808.513409 | 58992              | 15.848                     | 0                                     |
|               | PS(18:0_20:2) | 814.560359 | 71395              | 16.124                     | 0.0626                                |
|               | PS(18:0_20:5) | 808.513409 | 86776              | 16.405                     | 0.1266                                |
|               | PS(18:1_20:3) | 810.529059 | 106455             | 16.7                       | 0.1936                                |
|               | PS(18:0_18:2) | 786.529059 | 186815             | 17.511                     | 0.3781                                |
|               | PS(18:1/18:1) | 786.529059 | 196825             | 17.587                     | 0.3953                                |
|               | PS(18:0_22:4) | 838.560359 | 321963             | 18.297                     | 0.5567                                |
|               | PS(18:0_22:5) | 836.544709 | 357221             | 18.446                     | 0.5908                                |
|               | PS(18:0_20:4) | 810.529059 | 589944             | 19.17                      | 0.7553                                |
|               | PS(18:0_22:6) | 834.529059 | 697948             | 19.413                     | 0.8105                                |
| PS(18:0_18:1) | 788.544709    | 1243734    | 20.246             | 1                          |                                       |



Supplemental Table S9. Lipidomic analysis of TRAAK with a brain polar lipid extract (BEP).

| <i>Class</i>                 | <i>Lipid</i>    | <i>Ionization Mode</i> | <i>Adduct</i> | <i>Precursor m/z</i> | <i>CV1 Log<sub>2</sub> Area</i> | <i>CV2 Log<sub>2</sub> Area</i> | <i>CV3 Log<sub>2</sub> Area</i> | <i>CV4 Log<sub>2</sub> Area</i> |
|------------------------------|-----------------|------------------------|---------------|----------------------|---------------------------------|---------------------------------|---------------------------------|---------------------------------|
| <b>AC (Acyl carnitine)</b>   | AC(14:1)        | Positive               | [M+H]         | 370.2952             | 14.4405                         | 14.0288                         |                                 |                                 |
|                              | AC(16:0)        | Positive               | [M+H]         | 400.3421             |                                 |                                 |                                 | 17.8181                         |
|                              | AC(18:1)        | Positive               | [M+H]         | 426.3578             |                                 |                                 |                                 | 15.9522                         |
|                              | AC(18:2)        | Positive               | [M+H]         | 424.3421             |                                 | 14.2208                         | 15.7394                         | 15.4206                         |
| <b>ANA (Anandamide)</b>      | ANA(16:0)       | Positive               | [M+H]         | 300.2897             |                                 |                                 |                                 | 20.6858                         |
|                              | ANA(18:3)       | Positive               | [M+H]         | 322.2741             |                                 |                                 |                                 | 18.5419                         |
|                              | ANA(20:2)       | Positive               | [M+H]         | 352.3210             | 18.6755                         | 18.7338                         |                                 |                                 |
| <b>Cer (Ceramide)</b>        | Cer(d18:1/24:0) | Positive               | [M+H]         | 650.6446             | 15.9596                         | 15.5212                         | 14.8540                         | 16.2490                         |
| <b>DG (Diacylglycerol)</b>   | DG(16:0_18:1)   | Positive               | [M+NH4]       | 612.5562             | 12.7758                         |                                 |                                 |                                 |
|                              | DG(18:1/18:1)   | Positive               | [M+NH4]       | 638.5718             | 15.2322                         |                                 |                                 |                                 |
|                              | DG(18:1_18:2)   | Positive               | [M+NH4]       | 636.5562             | 13.2348                         |                                 |                                 |                                 |
| <b>FFA (Free fatty acid)</b> | FA 12:0         | Negative               | [M-H]         | 199.1704             | 12.3853                         |                                 |                                 | 17.2926                         |
|                              | FA 13:0         | Negative               | [M-H]         | 213.1860             |                                 |                                 |                                 | 18.1935                         |
|                              | FA 14:0         | Negative               | [M-H]         | 227.2017             | 13.8325                         | 17.8484                         | 14.0310                         | 21.0465                         |
|                              | FA 14:1         | Negative               | [M-H]         | 225.1860             |                                 |                                 |                                 | 20.3719                         |
|                              | FA 14:2         | Negative               | [M-H]         | 223.1704             |                                 |                                 |                                 | 13.9668                         |
|                              | FA 15:0         | Negative               | [M-H]         | 241.2173             | 14.9128                         | 15.1758                         |                                 | 21.9754                         |
|                              | FA 15:1         | Negative               | [M-H]         | 239.2017             |                                 |                                 |                                 | 20.7873                         |
|                              | FA 16:0         | Negative               | [M-H]         | 255.2330             | 24.7484                         | 28.1187                         | 20.6917                         | 23.6624                         |
|                              | FA 16:1         | Negative               | [M-H]         | 253.2173             | 14.7382                         |                                 |                                 | 22.3333                         |
|                              | FA 16:2         | Negative               | [M-H]         | 251.2017             |                                 |                                 |                                 | 17.3911                         |
|                              | FA 17:0         | Negative               | [M-H]         | 269.2486             | 17.2774                         | 17.9181                         | 15.0163                         | 20.2748                         |
|                              | FA 17:1         | Negative               | [M-H]         | 267.2330             |                                 |                                 |                                 | 21.1060                         |
|                              | FA 17:2         | Negative               | [M-H]         | 265.2173             | 10.3966                         |                                 |                                 | 16.0919                         |
|                              | FA 18:0         | Negative               | [M-H]         | 283.2643             | 24.8561                         | 27.3515                         | 21.7479                         | 25.0837                         |
| FA 18:1                      | Negative        | [M-H]                  | 281.2486      | 21.2938              | 24.8818                         | 17.9234                         | 23.4707                         |                                 |
| FA 18:2                      | Negative        | [M-H]                  | 279.2330      | 13.5206              |                                 |                                 | 20.4726                         |                                 |

|                                                |                        |          |          |          |         |         |         |         |
|------------------------------------------------|------------------------|----------|----------|----------|---------|---------|---------|---------|
|                                                | FA 18:3                | Negative | [M-H]    | 277.2173 |         |         |         | 16.7627 |
|                                                | FA 19:0                | Negative | [M-H]    | 297.2799 | 13.7699 |         | 11.2761 | 16.5201 |
|                                                | FA 19:1                | Negative | [M-H]    | 295.2643 | 11.2544 |         |         | 18.0003 |
|                                                | FA 20:0                | Negative | [M-H]    | 311.2956 | 19.0459 | 18.9910 | 18.4472 | 19.0821 |
|                                                | FA 20:1                | Negative | [M-H]    | 309.2799 | 14.4809 |         |         | 20.3013 |
|                                                | FA 20:2                | Negative | [M-H]    | 307.2643 |         |         |         | 19.5762 |
|                                                | FA 20:3                | Negative | [M-H]    | 305.2486 |         |         |         | 17.0642 |
|                                                | FA 20:4                | Negative | [M-H]    | 303.2330 | 12.2932 | 12.6223 |         | 17.9277 |
|                                                | FA 21:0a               | Negative | [M-H]    | 325.3112 | 13.0262 |         | 12.6303 | 14.9721 |
|                                                | FA 21:0b               | Negative | [M-H]    | 325.3112 | 14.5167 |         | 14.2545 | 14.9358 |
|                                                | FA 22:0                | Negative | [M-H]    | 339.3269 | 17.1873 | 17.2643 | 16.4546 | 17.1362 |
|                                                | FA 22:1                | Negative | [M-H]    | 337.3112 | 15.6732 | 15.6375 | 15.7953 | 18.4238 |
|                                                | FA 22:2                | Negative | [M-H]    | 335.2956 |         |         |         | 17.2862 |
|                                                | FA 22:3a               | Negative | [M-H]    | 333.2799 |         |         |         | 16.2082 |
|                                                | FA 22:3b               | Negative | [M-H]    | 333.2799 |         |         |         | 16.2719 |
|                                                | FA 22:4                | Negative | [M-H]    | 331.2643 |         |         |         | 16.9995 |
|                                                | FA 22:5                | Negative | [M-H]    | 329.2486 |         |         |         | 14.1189 |
|                                                | FA 22:6                | Negative | [M-H]    | 327.2330 |         |         |         | 14.9018 |
|                                                | FA 23:0                | Negative | [M-H]    | 353.3425 | 15.2516 | 15.0890 | 15.2427 | 15.7388 |
|                                                | FA 24:0a               | Negative | [M-H]    | 367.3582 | 13.6607 | 17.4340 | 13.5918 | 17.5754 |
|                                                | FA 24:0b               | Negative | [M-H]    | 367.3582 | 17.2956 |         | 17.4448 |         |
|                                                | FA 24:1                | Negative | [M-H]    | 365.3425 |         |         |         | 16.6828 |
|                                                | FA 25:0                | Negative | [M-H]    | 381.3738 | 15.8300 | 16.1034 | 15.5053 | 16.0189 |
|                                                | FA 26:0a               | Negative | [M-H]    | 395.3895 | 13.9758 | 17.1553 | 13.9493 | 17.6558 |
| FA 26:0b                                       | Negative               | [M-H]    | 395.3895 | 16.7029  |         | 16.9913 | 17.6301 |         |
| <b>HexCer<br/>(Hexosyl<br/>Ceramide)</b>       | HexCer(d18:2/2<br>4:0) | Negative | [M-H]    | 808.6672 |         | 11.6917 |         |         |
| <b>LPC (Lyso<br/>phosphatidyl<br/>choline)</b> | LPC(0:0/16:0)          | Positive | [M+H]    | 496.3398 |         |         |         | 16.8408 |
|                                                | LPC(0:0/18:0)          | Positive | [M+H]    | 524.3711 |         |         |         | 14.2323 |
|                                                | LPC(0:0/18:1)          | Positive | [M+H]    | 522.3554 |         |         |         | 14.7109 |
|                                                | LPC(16:0/0:0)          | Positive | [M+H]    | 496.3398 |         |         |         | 20.8733 |
|                                                | LPC(18:0/0:0)          | Positive | [M+H]    | 524.3711 |         |         |         | 17.4716 |

|                                      |                             |          |          |          |         |         |         |         |
|--------------------------------------|-----------------------------|----------|----------|----------|---------|---------|---------|---------|
|                                      |                             | Positive | [M+H]    | 522.3554 |         |         |         | 17.0966 |
|                                      | LPC(18:1/0:0)               |          |          |          |         |         |         |         |
| LPE (Lyso phosphatidyl ethanolamine) | LPE(0:0/18:0)               | Negative | [M-H]    | 480.3096 | 13.0828 |         |         | 10.7723 |
|                                      | LPE(0:0/18:1)               | Negative | [M-H]    | 480.3085 | 12.8323 |         |         |         |
|                                      | LPE(18:0/0:0)               | Negative | [M-H]    | 480.3096 | 9.4305  |         |         | 12.6159 |
|                                      | LPE(18:1/0:0)               | Negative | [M-H]    | 480.3085 | 12.8891 |         |         |         |
| PC (Phosphatidylcholine)             | PC(15:0_18:2)               | Positive | [M+H]    | 744.5538 |         | 16.2311 | 16.3327 |         |
|                                      | PC(15:0_20:4);PC(17:2_18:2) | Positive | [M+H]    | 768.5538 |         | 18.2055 | 18.1109 |         |
|                                      | PC(16:0/16:0)               | Positive | [M+H]    | 734.5694 |         | 15.1437 | 14.2813 |         |
|                                      | PC(16:0_18:1)               | Positive | [M+H]    | 760.5851 | 16.4143 | 19.3224 | 19.6746 | 16.2302 |
|                                      | PC(16:0_20:4);PC(18:1_18:3) | Positive | [M+H]    | 782.5694 | 18.8873 | 18.0576 | 18.6225 |         |
|                                      | PC(16:0_22:4)               | Positive | [M+H]    | 810.6007 |         |         | 15.4891 |         |
|                                      | PC(16:0_22:5);PC(18:0_20:5) | Positive | [M+H]    | 808.5851 | 14.7602 |         |         |         |
|                                      | PC(16:0_22:6)               | Positive | [M+H]    | 806.5694 | 15.6497 |         |         |         |
|                                      | PC(17:0_20:4)               | Positive | [M+H]    | 796.5851 | 16.9231 | 16.2434 | 15.3767 |         |
|                                      | PC(17:0_22:5)               | Positive | [M+H]    | 822.6007 | 13.5553 |         |         |         |
|                                      | PC(18:0_18:1)               | Positive | [M+H]    | 788.6164 | 18.9711 | 18.9775 | 18.2437 |         |
|                                      | PC(18:0_18:1)-              | Negative | [M-H]    | 846.6230 | 12.9642 |         |         |         |
|                                      | PC(18:0_18:2)               | Positive | [M+H]    | 786.6007 | 16.3416 | 13.4996 | 15.6961 |         |
|                                      | PC(18:0_20:4)               | Positive | [M+H]    | 810.6007 | 16.1985 |         | 15.5613 |         |
|                                      | PC(18:0_20:4)-              | Negative | [M-H]    | 868.6073 | 11.2720 |         |         |         |
|                                      | PC(18:0_22:6)               | Positive | [M+H]    | 892.6073 | 10.8258 |         |         |         |
|                                      | PC(18:1/18:1)               | Positive | [M+H]    | 786.6007 | 16.3228 |         | 15.4562 |         |
|                                      | PC(18:1_20:3)               | Positive | [M+H]    | 810.6007 |         |         | 15.9957 |         |
|                                      | PC(18:1_20:4)               | Positive | [M+H]    | 808.5851 | 15.1779 |         |         |         |
|                                      | PC(18:1_22:5)               | Positive | [M+H]    | 834.6007 | 14.4809 |         |         |         |
| PC(18:2/18:2)                        | Positive                    | [M+H]    | 782.5694 | 14.5002  |         |         |         |         |
| PC(37:4)                             | Positive                    | [M+H]    | 796.5851 | 17.1627  | 16.9330 |         |         |         |
| PC(37:5)                             | Positive                    | [M+H]    | 794.5694 | 19.0792  |         |         | 18.2140 |         |

|                                                                           |                                                                |                 |          |          |          |         |         |         |
|---------------------------------------------------------------------------|----------------------------------------------------------------|-----------------|----------|----------|----------|---------|---------|---------|
|                                                                           | PC(37:6)                                                       | Positive        | [M+H]    | 792.5538 | 19.1709  | 18.3582 | 18.4888 |         |
| <b>PC(O/P-)<br/>(Alyl/alkenyl<br/>ether<br/>phosphatidyl<br/>choline)</b> | PC(O-<br>16:0/20:4);PC(P-<br>18:0/18:3)                        | Positive        | [M+H]    | 768.5902 |          | 17.1619 |         |         |
|                                                                           | PC(P-16:0/16:0)                                                | Positive        | [M+H]    | 718.5745 |          | 14.7869 |         |         |
|                                                                           | PC(P-18:0/16:0)                                                | Positive        | [M+H]    | 746.6058 |          | 14.8993 | 13.8476 |         |
| <b>PE<br/>(Phosphatidy<br/>lethanolamin<br/>e)</b>                        | PE(16:0_18:0)                                                  | Negative        | [M-H]    | 718.5392 | 13.0773  |         | 11.6312 |         |
|                                                                           | PE(16:0_18:1)                                                  | Negative        | [M-H]    | 716.5236 | 12.1507  | 9.2691  | 13.8451 |         |
|                                                                           | PE(16:0_20:4);P<br>E(18:2/18:2)                                | Negative        | [M-H]    | 738.5079 |          | 12.2219 | 8.9396  | 13.4427 |
|                                                                           | PE(16:0_22:5);P<br>E(18:1_20:4)                                | Negative        | [M-H]    | 764.5236 |          | 13.8662 | 11.8498 | 13.9994 |
|                                                                           | PE(16:0_22:6)                                                  | Negative        | [M-H]    | 762.5079 | 15.0853  | 14.7149 | 13.9857 |         |
|                                                                           | PE(18:0_18:1)                                                  | Negative        | [M-H]    | 744.5549 | 12.1267  | 10.3955 | 15.6545 |         |
|                                                                           | PE(18:0_18:2)                                                  | Positive        | [M+H]    | 744.5538 | 15.4453  |         | 16.3985 |         |
|                                                                           | PE(18:0_18:2);P<br>E(18:1/18:1)                                | Negative        | [M-H]    | 742.5392 |          | 8.1137  | 15.8023 |         |
|                                                                           | PE(18:0_20:1)                                                  | Negative        | [M-H]    | 772.5862 | 13.6666  | 15.7404 | 14.0860 |         |
|                                                                           | PE(18:0_20:2)                                                  | Negative        | [M-H]    | 770.5705 | 13.0526  | 13.2636 |         |         |
|                                                                           | PE(18:0_20:3)                                                  | Negative        | [M-H]    | 768.5549 | 13.7825  |         |         |         |
|                                                                           | PE(18:0_20:4)                                                  | Negative        | [M-H]    | 766.5392 | 16.6604  | 12.8465 | 17.4380 | 14.2404 |
|                                                                           | PE(18:0_20:5)                                                  | Negative        | [M-H]    | 764.5236 |          |         | 13.7432 |         |
|                                                                           | PE(18:0_22:5)                                                  | Negative        | [M-H]    | 792.5549 | 15.1295  | 11.4263 | 14.9829 |         |
|                                                                           | PE(18:0_22:6)                                                  | Negative        | [M-H]    | 790.5392 | 16.8137  | 18.4464 | 17.5025 | 13.8812 |
|                                                                           | PE(18:1_20:5)                                                  | Positive        | [M+H]    | 764.5225 | 17.2850  |         | 16.1146 |         |
|                                                                           | PE(36:1)                                                       | Negative        | [M-H]    | 744.5549 | 17.2412  | 7.8329  | 14.4784 |         |
|                                                                           | PE(38:4)                                                       | Negative        | [M-H]    | 766.5392 |          | 12.7495 | 13.2519 | 6.4429  |
|                                                                           | PE(40:7)                                                       | Negative        | [M-H]    | 788.5236 | 12.4959  |         |         |         |
|                                                                           | <b>PE(O/P-)<br/>(Allyl/alkenyl<br/>ether<br/>phosphatidyl)</b> | PE(O-16:0/22:6) | Negative | [M-H]    | 748.5287 | 16.4791 |         |         |
| PE(O-<br>16:0/22:6);PE(P-<br>16:0/22:5);PE(P-<br>18:0/20:5)               |                                                                | Negative        | [M-H]    | 748.5287 |          | 13.3807 | 11.9267 |         |

|                           |                                 |          |          |          |         |         |         |         |
|---------------------------|---------------------------------|----------|----------|----------|---------|---------|---------|---------|
| ethanolamine)             | PE(O-18:0/20:3);PE(P-18:0/20:2) | Negative | [M-H]    | 754.5756 |         | 8.0928  |         |         |
|                           | PE(O-18:0/22:6)                 | Negative | [M-H]    | 776.5600 | 15.4182 | 16.4213 | 15.3782 |         |
|                           | PE(O-40:5);PE(P-40:4)           | Negative | [M-H]    | 778.5756 |         |         | 14.7181 |         |
|                           | PE(P-16:0/18:1)                 | Negative | [M-H]    | 700.5287 | 15.1061 | 17.6444 | 16.2746 |         |
|                           | PE(P-16:0/18:2);PE(P-20:0/18:2) | Negative | [M-H]    | 726.5443 |         |         | 17.3665 |         |
|                           | PE(P-16:0/20:2)                 | Negative | [M-H]    | 726.5443 | 15.5800 |         |         |         |
|                           | PE(P-16:0/20:2);PE(P-18:0/18:2) | Negative | [M-H]    | 726.5443 |         |         |         | 13.7922 |
|                           | PE(P-16:0/20:4)                 | Negative | [M-H]    | 722.5130 | 13.6484 | 14.9172 | 13.9904 |         |
|                           | PE(P-16:0/22:4)                 | Negative | [M-H]    | 750.5443 | 14.6122 | 15.5057 | 14.7772 |         |
|                           | PE(P-16:0/22:5)                 | Negative | [M-H]    | 748.5287 | 16.4791 |         |         |         |
|                           | PE(P-16:0/22:6)                 | Negative | [M-H]    | 746.5130 | 14.5867 | 9.0224  | 14.3341 |         |
|                           | PE(P-18:0/18:1)                 | Negative | [M-H]    | 728.5600 | 12.2393 | 14.1704 | 14.1264 |         |
|                           | PE(P-18:0/18:2)                 | Negative | [M-H]    | 726.5443 |         | 18.0953 |         |         |
|                           | PE(P-18:0/20:3)                 | Negative | [M-H]    | 752.5600 |         | 15.1015 |         |         |
|                           | PE(P-18:0/20:4)                 | Negative | [M-H]    | 750.5443 | 15.5772 | 17.4709 | 15.8737 |         |
|                           | PE(P-18:0/20:5)                 | Negative | [M-H]    | 748.5287 | 17.3129 |         |         |         |
|                           | PE(P-18:0/22:4)                 | Negative | [M-H]    | 778.5756 | 13.7159 | 12.9207 | 14.7454 |         |
|                           | PE(P-18:0/22:5)                 | Negative | [M-H]    | 776.5600 | 12.3894 | 16.4633 | 13.4633 |         |
|                           | PE(P-18:0/22:6)                 | Negative | [M-H]    | 774.5443 | 15.7331 | 17.4279 | 16.0072 |         |
| PI (Phosphatidylinositol) | PI(16:0_18:1)                   | Negative | [M-H]    | 835.5342 |         |         | 12.4165 |         |
|                           | PI(16:0_18:2)                   | Negative | [M-H]    | 833.5186 |         |         | 12.7659 |         |
|                           | PI(16:0_20:4)                   | Negative | [M-H]    | 857.5186 | 12.0885 | 13.5906 | 13.1759 |         |
|                           | PI(16:0_22:5);PI(18:1_20:4)     | Negative | [M-H]    | 883.5342 | 13.2949 | 7.5622  | 13.5619 |         |
|                           | PI(18:0_20:3)                   | Negative | [M-H]    | 887.5655 | 15.4724 |         | 11.4089 |         |
| PI(18:0_20:4)             | Negative                        | [M-H]    | 885.5499 | 17.9154  | 18.0033 | 17.0958 | 13.6347 |         |

|                                    |                                                          |          |         |          |         |         |         |         |
|------------------------------------|----------------------------------------------------------|----------|---------|----------|---------|---------|---------|---------|
|                                    | PI(18:0_22:3)                                            | Negative | [M-H]   | 915.5968 |         |         |         | 13.5093 |
| <b>PS<br/>(Phosphatidylserine)</b> | PS 15:0-18:0                                             | Negative | [M-H]   | 748.5134 | 17.2990 |         | 16.1439 |         |
|                                    | PS 16:0-17:1                                             | Negative | [M-H]   | 746.4978 | 14.6305 |         |         |         |
|                                    | PS 16:0-18:0                                             | Negative | [M-H]   | 762.5291 |         | 13.1362 |         |         |
|                                    | PS 16:0-19:0                                             | Negative | [M-H]   | 776.5447 | 13.3740 | 15.8990 |         |         |
|                                    | PS 16:0-19:1                                             | Negative | [M-H]   | 774.5291 | 17.1198 | 16.9216 | 15.6096 |         |
|                                    | PS 16:0-22:0                                             | Negative | [M-H]   | 818.5917 |         | 17.4990 | 16.7019 |         |
|                                    | PS 17:0-18:0                                             | Negative | [M-H]   | 776.5447 |         | 13.8437 |         |         |
|                                    | PS 18:0-18:0                                             | Negative | [M-H]   | 790.5604 |         | 17.8081 | 16.8846 |         |
|                                    | PS(40:0)                                                 | Negative | [M-H]   | 818.5917 | 15.8115 | 17.4990 | 16.7019 |         |
| <b>SM<br/>(Sphingomyelin)</b>      | SM(d17:0/18:1)                                           | Positive | [M+H]   | 717.5905 |         |         |         | 16.9351 |
|                                    | SM(d17:1/16:0)                                           | Positive | [M+H]   | 689.5592 |         |         | 16.8824 |         |
|                                    | SM(d17:1/18:0)                                           | Positive | [M+H]   | 717.5905 | 16.6237 |         | 16.9694 |         |
|                                    | SM(d35:2)                                                | Positive | [M+H]   | 715.5749 |         |         |         | 16.4905 |
| <b>TG<br/>(Triacylglycerol)</b>    | TG(12:0_16:0_18:1);TG(14:0_14:0_18:1);TG(14:0_16:0_16:1) | Positive | [M+NH4] | 794.7232 | 18.3617 | 18.0075 | 18.3879 |         |
|                                    | TG(16:0_18:0_19:1)                                       | Positive | [M+NH4] | 892.8328 | 14.7183 |         |         |         |
|                                    | TG(12:0_12:0_18:1);TG(12:0_14:0_16:1);TG(12:0_14:1_16:0) | Positive | [M+NH4] | 738.6606 | 16.6518 | 17.1273 | 17.2584 | 17.6946 |
|                                    | TG(12:0_14:0_18:1);TG(12:0_16:0_16:1)                    | Positive | [M+NH4] | 766.6919 | 17.5404 | 17.6050 | 17.5726 | 17.8273 |
|                                    | TG(12:0_14:0_18:2);TG(12:0_16:1_16:1)                    | Positive | [M+NH4] | 764.6763 | 16.1674 | 15.9412 | 16.1972 | 16.5485 |

|                                                          |          |         |          |         |         |         |         |
|----------------------------------------------------------|----------|---------|----------|---------|---------|---------|---------|
| TG(12:0_16:1_18:1);TG(14:0_14:0_18:2);TG(14:0_16:1_16:1) | Positive | [M+NH4] | 792.7076 | 17.3864 | 17.1474 | 17.1434 |         |
| TG(14:0_14:0_16:0);TG(12:0_16:0_16:0)                    | Positive | [M+NH4] | 768.7076 | 17.3928 | 17.6320 | 17.8065 | 17.4027 |
| TG(14:0_16:0_16:0)                                       | Positive | [M+NH4] | 796.7389 | 18.9837 | 18.6314 | 19.0080 | 19.0569 |
| TG(14:0_16:0_17:0)                                       | Positive | [M+NH4] | 810.7545 | 17.6223 | 17.0372 | 17.7237 | 17.5282 |
| TG(14:0_16:0_17:1)                                       | Positive | [M+NH4] | 808.7389 | 18.2666 | 17.0341 | 17.4432 | 17.8793 |
| TG(14:0_16:0_18:1);TG(16:0_16:0_16:1)                    | Positive | [M+NH4] | 822.7545 | 19.2475 | 18.7055 | 19.2912 | 19.4108 |
| TG(14:0_16:0_18:2);TG(14:0_16:1_18:1);TG(16:0_16:1_16:1) | Positive | [M+NH4] | 820.7389 | 18.8136 | 18.1633 | 18.6565 | 19.0961 |
| TG(14:0_16:1_18:2)                                       | Positive | [M+NH4] | 818.7232 | 16.8378 |         | 17.2093 | 17.5279 |
| TG(14:0_18:1_18:1)                                       | Positive | [M+NH4] | 848.7702 | 18.8388 | 19.1140 | 19.6340 | 19.9772 |
| TG(14:0_18:1_18:2);TG(16:1_16:1_18:1)                    | Positive | [M+NH4] | 846.7545 | 18.0003 | 18.2932 | 18.8986 | 18.8142 |
| TG(15:0_16:0_18:1);TG(15:0_17:0_17:1)                    | Positive | [M+NH4] | 836.7702 | 16.8109 | 16.1672 | 17.2222 | 16.7705 |
| TG(15:0_16:0_18:2);TG(15:0_16:1_18:1)                    | Positive | [M+NH4] | 834.7545 | 17.3939 |         | 16.5785 | 17.2967 |

|                                       |          |         |          |         |         |         |         |
|---------------------------------------|----------|---------|----------|---------|---------|---------|---------|
| TG(15:0_16:0_20:3);TG(16:0_17:1_18:2) | Positive | [M+NH4] | 860.7702 | 15.0955 |         |         |         |
| TG(16:0_16:0_18:0)                    | Positive | [M+NH4] | 852.8015 | 17.4048 | 17.5513 | 17.5032 | 17.9631 |
| TG(16:0_16:0_18:1)                    | Positive | [M+NH4] | 850.7858 | 19.2377 | 19.3924 | 19.8409 | 20.1243 |
| TG(16:0_16:0_18:2)                    | Positive | [M+NH4] | 848.7702 |         | 19.1140 | 19.6340 | 19.9671 |
| TG(16:0_16:1_20:4);TG(16:0_18:2_18:3) | Positive | [M+NH4] | 870.7545 | 12.3520 |         |         |         |
| TG(16:0_17:0_18:1)                    | Positive | [M+NH4] | 864.8015 | 16.9079 | 16.3788 | 16.7133 | 17.0208 |
| TG(16:0_17:0_18:2)                    | Positive | [M+NH4] | 862.7858 | 16.3377 | 16.1552 | 16.5909 | 16.9674 |
| TG(16:0_17:1_18:1)                    | Positive | [M+NH4] | 862.7858 |         | 16.3374 | 16.5795 | 16.9674 |
| TG(16:0_18:0_18:0)                    | Positive | [M+NH4] | 880.8328 | 15.9227 | 16.1681 | 16.7381 | 16.6320 |
| TG(16:0_18:0_18:1)                    | Positive | [M+NH4] | 878.8171 | 18.6606 | 18.8709 | 19.3817 | 19.6014 |
| TG(16:0_18:0_18:2);TG(16:0_18:1_18:1) | Positive | [M+NH4] | 876.8015 | 20.4848 | 20.7774 | 21.3056 | 21.5805 |
| TG(16:0_18:1_18:2)                    | Positive | [M+NH4] | 874.7858 | 20.1524 | 20.6275 | 20.9206 | 21.0661 |
| TG(16:0_18:1_18:3);TG(16:0_18:2_18:2) | Positive | [M+NH4] | 872.7702 | 18.5978 | 19.1232 | 19.4470 | 19.7265 |
| TG(16:0_18:1_20:4)                    | Positive | [M+NH4] | 898.7858 | 19.6658 |         | 20.1304 | 20.1668 |
| TG(16:0_18:2_19:0)                    | Positive | [M+NH4] | 890.8171 | 15.5553 |         |         |         |



|                                       |          |         |          |         |         |         |         |
|---------------------------------------|----------|---------|----------|---------|---------|---------|---------|
| TG(16:1_16:1_18:2)                    | Positive | [M+NH4] | 844.7389 | 14.8142 |         | 15.4268 |         |
| TG(16:1_18:1_20:4);TG(18:2/18:2/18:2) | Positive | [M+NH4] | 896.7702 | 18.9126 | 19.2190 | 19.3493 | 19.6251 |
| TG(16:1_18:2_18:3)                    | Positive | [M+NH4] | 868.7389 | 14.9013 | 15.5807 |         |         |
| TG(18:0/18:0/18:0)                    | Positive | [M+NH4] | 908.8641 | 14.9625 | 15.3194 | 15.9164 | 16.8269 |
| TG(18:0_18:0_18:1)                    | Positive | [M+NH4] | 906.8484 | 17.7671 | 18.2071 | 18.4909 | 18.9411 |
| TG(18:0_18:1_18:1)                    | Positive | [M+NH4] | 904.8328 | 19.2782 | 19.8134 | 20.4932 | 20.6431 |
| TG(18:0_18:1_18:2);TG(18:1/18:1/18:1) | Positive | [M+NH4] | 902.8171 | 22.3211 | 22.4374 | 22.8249 | 22.9645 |
| TG(18:0_18:1_20:1)                    | Positive | [M+NH4] | 932.8641 |         |         | 18.5196 | 15.1533 |
| TG(18:1_18:2_18:2)                    | Positive | [M+NH4] | 898.7858 | 19.3813 | 19.7188 | 19.9184 | 20.0657 |
| TG(18:1_20:1_20:1)                    | Positive | [M+NH4] | 958.8797 | 13.9166 | 18.5778 | 18.8574 | 18.9987 |
| TG(18:2_18:3_18:3)                    | Positive | [M+NH4] | 892.7389 |         | 16.1048 | 15.9678 |         |
| TG(46:3)                              | Positive | [M+NH4] | 790.6919 | 16.9396 |         |         |         |
| TG(48:0)                              | Positive | [M+NH4] | 824.7702 | 19.7340 | 19.6445 | 19.5960 | 19.8613 |
| TG(49:0)                              | Positive | [M+NH4] | 838.7858 | 18.5139 | 18.1030 | 18.2391 | 18.3790 |
| TG(49:3)                              | Positive | [M+NH4] | 832.7389 | 17.0321 |         |         | 16.6639 |
| TG(52:6)                              | Positive | [M+NH4] | 868.7389 |         | 15.6155 | 15.3432 |         |
| TG(54:4)                              | Positive | [M+NH4] | 900.8015 | 20.9515 | 21.3765 | 21.1352 | 21.4119 |
| TG(54:6)                              | Positive | [M+NH4] | 896.7702 | 19.2079 |         |         | 19.4845 |
| TG(54:7)                              | Positive | [M+NH4] | 894.7545 | 17.4287 | 17.8175 |         |         |
| TG(58:2)                              | Positive | [M+NH4] | 960.8954 | 17.3593 | 19.9223 | 19.9517 | 19.6495 |
| TG(58:4)                              | Positive | [M+NH4] | 956.8641 | 15.3659 |         |         |         |

|  |           |          |         |          |         |         |         |         |
|--|-----------|----------|---------|----------|---------|---------|---------|---------|
|  | TG(58:5)  | Positive | [M+NH4] | 954.8484 | 17.5618 | 18.1009 | 18.2945 |         |
|  | TG(60:10) | Positive | [M+NH4] | 972.8015 |         | 17.0425 |         |         |
|  | TG(60:13) | Positive | [M+NH4] | 966.7545 |         |         |         | 16.1705 |

Supplemental Table S10. Lipidomic analysis of TREK2 with a brain polar lipid extract (BEP).

| <i>Class</i>          | <i>Lipid</i> | <i>Ionization Mode</i> | <i>Adduct</i> | <i>Precursor m/z</i> | <i>CV1 Log<sub>2</sub> Area</i> | <i>CV2 Log<sub>2</sub> Area</i> | <i>CV3 Log<sub>2</sub> Area</i> | <i>CV4 Log<sub>2</sub> Area</i> |
|-----------------------|--------------|------------------------|---------------|----------------------|---------------------------------|---------------------------------|---------------------------------|---------------------------------|
| FFA (Free fatty acid) | FA 12:0      | Negative               | [M-H]         | 199.1704             |                                 |                                 |                                 | 14.68                           |
|                       | FA 14:0      | Negative               | [M-H]         | 227.2017             | 16.02                           | 16.02                           | 15.98                           | 15.96                           |
|                       | FA 15:0      | Negative               | [M-H]         | 241.2173             | 14.38                           | 14.38                           |                                 |                                 |
|                       | FA 16:0      | Negative               | [M-H]         | 255.2330             | 20.62                           | 20.62                           | 20.67                           | 19.91                           |
|                       | FA 17:0a     | Negative               | [M-H]         | 269.2486             | 13.70                           | 13.70                           | 13.04                           | 13.96                           |
|                       | FA 17:0b     | Negative               | [M-H]         | 269.2486             |                                 |                                 | 14.46                           |                                 |
|                       | FA 18:1      | Negative               | [M-H]         | 281.2486             | 16.68                           | 16.68                           | 16.94                           |                                 |
|                       | FA 18:0      | Negative               | [M-H]         | 283.2643             | 21.77                           | 21.77                           | 22.22                           | 22.10                           |
|                       | FA 20:4      | Negative               | [M-H]         | 303.2330             | 13.71                           | 13.71                           |                                 |                                 |
|                       | FA 20:0a     | Negative               | [M-H]         | 311.2956             |                                 |                                 | 15.16                           | 16.91                           |
|                       | FA 20:0b     | Negative               | [M-H]         | 311.2956             | 17.54                           | 17.54                           | 15.15                           |                                 |
|                       | FA 21:0      | Negative               | [M-H]         | 325.3112             | 15.16                           | 15.16                           |                                 | 13.63                           |
|                       | FA 22:6      | Negative               | [M-H]         | 327.2330             | 12.90                           | 12.90                           |                                 |                                 |
|                       | FA 22:1      | Negative               | [M-H]         | 337.3112             | 16.72                           | 16.72                           | 16.52                           | 16.92                           |

|                                           |                                 |          |       |          |       |       |       |       |
|-------------------------------------------|---------------------------------|----------|-------|----------|-------|-------|-------|-------|
|                                           | FA 22:0                         | Negative | [M-H] | 339.3269 | 16.90 | 16.90 | 16.75 | 16.93 |
|                                           | FA 23:0                         | Negative | [M-H] | 353.3425 | 15.76 | 15.76 | 16.13 | 16.34 |
|                                           | FA 24:0a                        | Negative | [M-H] | 367.3582 |       |       | 18.24 | 14.32 |
|                                           | FA 24:0b                        | Negative | [M-H] | 367.3582 | 18.30 | 18.30 | 18.81 | 18.28 |
|                                           | FA 25:0                         | Negative | [M-H] | 381.3738 | 17.35 | 17.35 | 16.52 | 17.22 |
|                                           | FA 26:0a                        | Negative | [M-H] | 395.3895 | 13.98 | 13.98 | 13.64 | 14.08 |
|                                           | FA 26:0b                        | Negative | [M-H] | 395.3895 | 16.75 | 16.75 | 17.03 | 17.74 |
| <b>LPA<br/>(Lysophosphatidic acid)</b>    | LPA 17:3                        | Negative | [M-H] | 417.2048 | 17.07 | 17.07 | 17.04 | 16.73 |
| <b>LPG<br/>(Lysophosphatidylglycerol)</b> | LPG 18:1                        | Negative | [M-H] | 509.2885 | 16.54 | 16.54 | 17.21 | 13.24 |
| <b>PC<br/>(Phosphatidylcholine)</b>       | PC(16:0/16:0)                   | Negative | [M-H] | 792.5760 | 13.62 | 13.62 | 12.64 | 12.62 |
|                                           | PC(16:0_18:1)                   | Negative | [M-H] | 818.5917 | 18.39 | 18.39 | 16.80 | 15.86 |
|                                           | PC(16:0_20:4)                   | Negative | [M-H] | 840.5760 | 14.88 | 14.88 |       |       |
|                                           | PC(18:0_18:2)                   | Negative | [M-H] | 844.6073 | 14.88 | 14.88 |       |       |
|                                           | PC(18:0_18:1)                   | Negative | [M-H] | 846.6230 | 15.86 | 15.86 | 15.18 | 14.12 |
|                                           | PC(18:0_20:4)                   | Negative | [M-H] | 868.6073 | 14.73 | 14.73 |       |       |
| <b>PE<br/>(Phosphatidylethanolamine)</b>  | PE(16:0_18:1)                   | Negative | [M-H] | 716.5236 |       |       | 12.78 |       |
|                                           | PE(16:0_20:4);<br>PE(18:2/18:2) | Negative | [M-H] | 738.5079 | 14.28 | 14.28 |       |       |
|                                           | PE(18:1/18:1)                   | Negative | [M-H] | 742.5392 | 16.08 | 16.08 | 14.24 | 13.73 |
|                                           | PE(18:0_18:1)                   | Negative | [M-H] | 744.5549 | 14.27 | 14.27 | 13.72 | 13.74 |
|                                           | PE(36:1)                        | Negative | [M-H] | 744.5549 |       |       |       | 13.74 |
|                                           | PE(16:0_22:6)                   | Negative | [M-H] | 762.5079 | 15.28 | 15.28 |       |       |

|                                                                        |                                      |               |          |          |          |       |       |       |
|------------------------------------------------------------------------|--------------------------------------|---------------|----------|----------|----------|-------|-------|-------|
|                                                                        | PE(16:0_22:5);<br>PE(18:1_20:4)      | Negative      | [M-H]    | 764.5236 | 15.00    | 15.00 |       |       |
|                                                                        | PE(18:0_20:4)                        | Negative      | [M-H]    | 766.5392 | 16.74    | 16.74 | 14.84 | 14.10 |
|                                                                        | PE(18:0_22:6)                        | Negative      | [M-H]    | 790.5392 | 16.86    | 16.86 | 14.50 | 13.70 |
|                                                                        | PE(18:0_22:5)                        | Negative      | [M-H]    | 792.5549 | 14.84    | 14.84 | 12.55 | 12.64 |
| <b>PE(O/P-)<br/>(Alkyl/alkenyl ether<br/>phosphatidylethanolamine)</b> | PE(P-16:0/18:1)                      | Negative      | [M-H]    | 700.5287 | 16.39    | 16.39 | 15.45 | 14.75 |
|                                                                        | PE(P-16:0/20:4)                      | Negative      | [M-H]    | 722.5130 | 15.17    | 15.17 | 13.13 |       |
|                                                                        | PE(P-16:0/20:2)                      | Negative      | [M-H]    | 726.5443 |          |       |       | 15.09 |
|                                                                        | PE(P-18:0/18:2)                      | Negative      | [M-H]    | 726.5443 | 17.75    | 17.75 | 15.80 |       |
|                                                                        | PE(P-18:0/18:1)                      | Negative      | [M-H]    | 728.5600 | 14.44    | 14.44 | 13.76 | 13.49 |
|                                                                        | PE(P-16:0/22:5)                      | Negative      | [M-H]    | 748.5287 |          |       | 14.79 |       |
|                                                                        | PE(P-16:0/22:4)                      | Negative      | [M-H]    | 750.5443 | 15.91    | 15.91 | 13.54 | 13.10 |
|                                                                        | PE(P-18:0/20:4)                      | Negative      | [M-H]    | 750.5443 | 16.68    | 16.68 | 14.76 | 14.23 |
|                                                                        | PE(P-18:0/22:6)                      | Negative      | [M-H]    | 774.5443 | 16.80    | 16.80 |       | 13.96 |
|                                                                        | PE(O-18:0/22:6)                      | Negative      | [M-H]    | 776.5600 | 16.26    | 16.26 |       |       |
|                                                                        | PE(P-18:0/22:4)                      | Negative      | [M-H]    | 778.5756 | 15.24    | 15.24 | 13.95 |       |
|                                                                        | <b>PI<br/>(Phosphatidylinositol)</b> | PI(16:0_20:4) | Negative | [M-H]    | 857.5186 | 13.33 | 13.33 |       |
| PI(18:0_20:4)                                                          |                                      | Negative      | [M-H]    | 885.5499 | 16.56    | 16.56 | 13.58 | 12.57 |
| <b>PS<br/>(Phosphatidylserine)</b>                                     | PS 16:0-17:1                         | Negative      | [M-H]    | 746.4978 | 14.58    | 14.58 |       |       |
|                                                                        | PS 15:0-18:0                         | Negative      | [M-H]    | 748.5134 | 17.31    | 17.31 |       |       |
|                                                                        | PS 16:0-19:1                         | Negative      | [M-H]    | 774.5291 | 16.46    | 16.46 | 14.12 | 13.76 |

|                                             |                             |          |         |          |       |       |       |       |
|---------------------------------------------|-----------------------------|----------|---------|----------|-------|-------|-------|-------|
|                                             | PS 16:0-19:0                | Negative | [M-H]   | 776.5447 | 15.53 | 15.53 |       | 13.13 |
|                                             | PS 17:0-18:0                | Negative | [M-H]   | 776.5447 | 13.81 | 13.81 |       |       |
|                                             | PS(40:0)                    | Negative | [M-H]   | 846.6230 | 15.89 | 15.89 | 15.29 | 14.41 |
| <b>AC (Acyl carnitine)</b>                  | AC(18:2)                    | Positive | [M+H]   | 424.3421 |       |       |       | 18.79 |
| <b>ANA (Anandamide)</b>                     | ANA(20:1)                   | Positive | [M+H]   | 354.3367 |       |       |       | 13.58 |
| <b>Cer (Ceramide)</b>                       | Cer(d18:1/24:0)             | Positive | [M+H]   | 650.6446 | 15.41 |       |       |       |
| <b>DG (Diacylglycerol)</b>                  | DG(16:0_18:1)               | Positive | [M+NH4] | 612.5562 | 16.29 |       |       |       |
|                                             | DG(18:0_18:1)               | Positive | [M+NH4] | 640.5875 | 16.21 | 14.74 | 15.36 |       |
| <b>LPC (Lyso phosphatidyl choline)</b>      | LPC(0:0/16:0)               | Positive | [M+H]   | 496.3398 | 14.04 | 15.09 |       |       |
|                                             | LPC(16:0/0:0)               | Positive | [M+H]   | 496.3398 | 17.90 |       |       |       |
|                                             | LPC(0:0/18:1)               | Positive | [M+H]   | 522.3554 | 15.56 |       |       |       |
|                                             | LPC(18:1/0:0)               | Positive | [M+H]   | 522.3554 | 17.28 |       |       |       |
|                                             | LPC(0:0/18:0)               | Positive | [M+H]   | 524.3711 | 11.94 |       |       |       |
|                                             | LPC(18:0/0:0)               | Positive | [M+H]   | 524.3711 | 17.09 |       |       |       |
| <b>LPE (Lyso phosphatidyl ethanolamine)</b> | LPE(0:0/18:1)               | Positive | [M+H]   | 480.3085 | 16.48 |       |       |       |
|                                             | LPE(18:1/0:0)               | Positive | [M+H]   | 480.3085 | 16.61 |       |       |       |
|                                             | LPE(0:0/22:6)               | Positive | [M+H]   | 526.2928 | 14.64 | 12.32 |       |       |
|                                             | LPE(22:6/0:0)               | Positive | [M+H]   | 526.2928 | 15.45 | 11.87 |       |       |
| <b>PC (Phosphatidyl choline)</b>            | PC(14:0_16:0)               | Positive | [M+H]   | 706.5381 | 18.47 | 14.69 |       |       |
|                                             | PC(14:0_18:1);PC(16:0_16:1) | Positive | [M+H]   | 732.5538 | 20.23 | 15.62 |       |       |
|                                             | PC(16:0/16:0)               | Positive | [M+H]   | 734.5694 | 21.83 | 17.74 | 15.39 | 14.89 |
|                                             | PC(15:0_18:2)               | Positive | [M+H]   | 744.5538 | 21.46 | 17.52 |       |       |
|                                             | PC(16:0_18:3)               | Positive | [M+H]   | 756.5538 | 16.89 | 14.16 |       |       |
|                                             | PC(16:0_18:2)               | Positive | [M+H]   | 758.5694 | 18.85 |       | 13.39 |       |
|                                             | PC(16:0_18:1)               | Positive | [M+H]   | 760.5851 | 24.23 | 20.75 | 18.95 | 18.49 |

|               |                                     |          |          |          |       |       |       |       |
|---------------|-------------------------------------|----------|----------|----------|-------|-------|-------|-------|
|               | PC(16:0_18:0)                       | Positive | [M+H]    | 762.6007 | 20.33 | 16.16 |       |       |
|               | PC(15:0_20:4)<br>;PC(17:2_18:2<br>) | Positive | [M+H]    | 768.5538 | 18.29 | 18.91 | 16.79 | 15.83 |
|               | PC(17:0_18:3)<br>a                  | Positive | [M+H]    | 770.5694 | 17.72 |       |       |       |
|               | PC(17:0_18:3)<br>b                  | Positive | [M+H]    | 770.5694 | 17.87 |       |       |       |
|               | PC(17:0_18:2)<br>a                  | Positive | [M+H]    | 772.5851 | 18.78 |       |       |       |
|               | PC(16:0_20:4)<br>;PC(18:1_18:3<br>) | Positive | [M+H]    | 782.5694 | 19.88 | 16.76 | 15.29 | 14.94 |
|               | PC(18:2/18:2)                       | Positive | [M+H]    | 782.5694 |       | 16.94 |       | 14.66 |
|               | PC(18:0_18:2)                       | Positive | [M+H]    | 786.6007 |       | 11.20 |       |       |
|               | PC(18:1/18:1)                       | Positive | [M+H]    | 786.6007 | 20.97 | 8.11  | 15.29 | 15.20 |
|               | PC(18:0_18:1)                       | Positive | [M+H]    | 788.6164 | 23.47 | 19.07 | 17.32 | 16.88 |
|               | PC(37:6)a                           | Positive | [M+H]    | 792.5538 | 22.21 | 18.69 |       | 15.80 |
|               | PC(37:6)b                           | Positive | [M+H]    | 792.5538 |       |       | 16.45 |       |
|               | PC(15:0_22:5)                       | Positive | [M+H]    | 794.5694 | 21.46 |       | 14.84 |       |
|               | PC(37:5)a                           | Positive | [M+H]    | 794.5694 |       | 17.29 |       | 13.89 |
|               | PC(17:0_20:4)                       | Positive | [M+H]    | 796.5851 |       | 16.99 |       |       |
|               | PC(37:4)                            | Positive | [M+H]    | 796.5851 | 21.25 | 16.99 | 14.76 | 14.32 |
|               | PC(16:0_20:4)<br>;PC(18:1_18:3<br>) | Positive | [M+H]    | 804.5514 | 19.88 | 16.76 | 15.29 | 14.94 |
|               | PC(16:0_22:6)                       | Positive | [M+H]    | 806.5694 | 18.83 |       |       |       |
|               | PC(18:2_20:4)                       | Positive | [M+H]    | 806.5694 |       | 15.64 |       |       |
|               | PC(18:1/18:1)                       | Positive | [M+H]    | 808.5827 | 20.97 | 8.11  | 15.29 | 15.20 |
| PC(18:1_20:4) | Positive                            | [M+H]    | 808.5851 | 18.14    | 14.68 |       |       |       |
| PC(18:0_18:1) | Positive                            | [M+H]    | 810.5983 | 23.47    | 19.07 | 17.32 | 16.88 |       |
| PC(16:0_22:4) | Positive                            | [M+H]    | 810.6007 | 20.61    | 16.49 |       | 14.20 |       |

|                                                                           |                                 |          |       |          |       |       |       |       |
|---------------------------------------------------------------------------|---------------------------------|----------|-------|----------|-------|-------|-------|-------|
|                                                                           | PC(18:0_20:4)                   | Positive | [M+H] | 810.6007 | 19.50 |       |       |       |
|                                                                           | PC(18:0_20:2)                   | Positive | [M+H] | 814.6320 | 17.49 |       |       |       |
|                                                                           | PC(18:1_22:6)                   | Positive | [M+H] | 832.5851 | 16.37 | 12.86 |       |       |
|                                                                           | PC(18:0_22:6)                   | Positive | [M+H] | 834.6007 |       | 15.37 |       |       |
|                                                                           | PC(18:0_22:4)                   | Positive | [M+H] | 838.6320 | 17.84 |       |       |       |
| <b>PC(O/P-)<br/>(Akyl/alkenyl<br/>ether<br/>phosphatidyl<br/>choline)</b> | PC(P-32:0);PC(O-32:1)           | Positive | [M+H] | 718.5745 | 16.95 |       |       |       |
|                                                                           | PC(P-18:0/16:0)                 | Positive | [M+H] | 746.6058 | 20.26 | 15.59 |       |       |
|                                                                           | PC(O-16:0/20:3)                 | Positive | [M+H] | 770.6058 | 17.69 |       |       |       |
|                                                                           | PC(P-18:0/18:1)                 | Positive | [M+H] | 772.6215 | 15.81 |       |       |       |
|                                                                           | PC(O-40:6);PC(P-40:5)           | Positive | [M+H] | 820.6215 | 16.70 |       |       |       |
|                                                                           | PC(O-18:0/22:5);PC(P-18:0/22:4) | Positive | [M+H] | 822.6371 |       | 13.96 |       |       |
| <b>PE<br/>(Phosphatidyl<br/>ethanolamin<br/>e)</b>                        | PE(16:0_18:1)                   | Positive | [M+H] | 718.5381 | 20.79 | 16.78 |       |       |
|                                                                           | PE(18:1_18:2)<br>a              | Positive | [M+H] | 742.5381 | 16.87 |       |       |       |
|                                                                           | PE(18:1_18:2)<br>b              | Positive | [M+H] | 742.5381 | 15.87 |       |       |       |
|                                                                           | PE(18:0_18:2)                   | Positive | [M+H] | 744.5538 | 21.33 | 17.52 |       | 15.35 |
|                                                                           | PE(18:0_18:1)                   | Positive | [M+H] | 746.5694 | 22.10 | 18.04 | 15.66 | 15.17 |
|                                                                           | PE(16:0_22:6)                   | Positive | [M+H] | 764.5225 | 20.13 | 16.59 |       |       |
|                                                                           | PE(18:0_20:5)                   | Positive | [M+H] | 766.5381 | 18.87 | 16.23 |       |       |
|                                                                           | PE(18:1_20:4)                   | Positive | [M+H] | 766.5381 | 19.86 |       |       |       |
| <b>SM<br/>(Sphingomye<br/>lin)</b>                                        | SM(d34:1)                       | Positive | [M+H] | 703.5749 | 16.43 |       |       |       |
|                                                                           | SM(d18:2/18:0)                  | Positive | [M+H] | 729.5905 | 17.09 |       |       |       |





|                                                          |          |         |          |       |       |       |       |  |
|----------------------------------------------------------|----------|---------|----------|-------|-------|-------|-------|--|
| 14:0_16:0_16:1)                                          |          |         |          |       |       |       |       |  |
| TG(14:0_16:0_16:0)                                       | Positive | [M+NH4] | 796.7389 | 17.32 | 16.74 | 17.02 | 17.15 |  |
| TG(14:0_16:0_17:1)                                       | Positive | [M+NH4] | 808.7389 | 15.86 | 15.92 | 15.86 |       |  |
| TG(14:0_16:0_17:0)                                       | Positive | [M+NH4] | 810.7545 | 16.86 | 16.98 | 16.68 | 16.83 |  |
| TG(14:0_16:0_18:2);TG(14:0_16:1_18:1);TG(16:0_16:1_16:1) | Positive | [M+NH4] | 820.7389 | 15.56 | 15.71 | 15.45 | 15.68 |  |
| TG(14:0_16:0_18:1);TG(16:0_16:0_16:1)                    | Positive | [M+NH4] | 822.7545 | 16.39 | 16.19 | 16.46 | 16.22 |  |
| TG(48:0)                                                 | Positive | [M+NH4] | 824.7702 | 17.47 | 17.33 | 17.36 | 17.62 |  |
| TG(15:0_16:0_18:2);TG(15:0_16:1_18:1)                    | Positive | [M+NH4] | 834.7545 | 15.10 | 14.66 | 14.70 |       |  |
| TG(15:0_16:0_18:1);TG(15:0_17:0_17:1)                    | Positive | [M+NH4] | 836.7702 | 15.54 |       |       |       |  |
| TG(49:0)                                                 | Positive | [M+NH4] | 838.7858 | 16.07 | 16.21 | 16.19 | 15.88 |  |
| TG(14:0_18:3_18:3)                                       | Positive | [M+NH4] | 840.7076 | 17.14 |       |       |       |  |
| TG(16:1_16:1_18:3)                                       | Positive | [M+NH4] | 842.7232 | 17.33 |       |       |       |  |
| TG(14:0_18:1_18:2);TG(16:1_16:1_18:1)                    | Positive | [M+NH4] | 846.7545 | 14.82 | 14.33 | 13.97 |       |  |
| TG(14:0_18:1_18:1)                                       | Positive | [M+NH4] | 848.7702 | 16.80 | 16.35 |       | 16.49 |  |

|  |                                       |          |         |          |       |       |       |       |
|--|---------------------------------------|----------|---------|----------|-------|-------|-------|-------|
|  | TG(16:0_16:0_18:2)                    | Positive | [M+NH4] | 848.7702 | 16.80 | 15.98 | 16.14 |       |
|  | TG(16:0_16:0_18:1)                    | Positive | [M+NH4] | 850.7858 | 17.12 | 16.18 | 16.34 | 16.07 |
|  | TG(16:0_16:0_18:0)                    | Positive | [M+NH4] | 852.8015 | 17.48 | 17.28 | 17.24 | 17.26 |
|  | TG(16:0_17:0_18:2)                    | Positive | [M+NH4] | 862.7858 | 14.96 |       |       |       |
|  | TG(16:0_18:1_18:3);TG(16:0_18:2_18:2) | Positive | [M+NH4] | 872.7702 | 16.12 | 14.72 | 15.12 | 15.22 |
|  | TG(16:0_18:1_18:2)                    | Positive | [M+NH4] | 874.7858 | 17.42 | 15.50 | 14.80 | 15.36 |
|  | TG(16:0_18:0_18:2);TG(16:0_18:1_18:1) | Positive | [M+NH4] | 876.8015 | 18.54 | 16.40 | 16.31 | 16.50 |
|  | TG(16:0_18:0_18:1)                    | Positive | [M+NH4] | 878.8171 | 17.19 | 15.39 | 15.27 | 14.55 |
|  | TG(16:0_18:0_18:0)                    | Positive | [M+NH4] | 880.8328 | 16.61 | 16.30 | 16.47 | 16.39 |
|  | TG(18:1_18:2_18:2)                    | Positive | [M+NH4] | 898.7858 | 15.20 | 14.69 | 14.58 | 15.05 |
|  | TG(54:4)                              | Positive | [M+NH4] | 900.8015 | 15.83 |       |       |       |
|  | TG(18:0_18:1_18:2);TG(18:1/18:1/18:1) | Positive | [M+NH4] | 902.8171 | 16.64 | 15.75 | 15.49 | 15.37 |
|  | TG(18:0_18:1_18:1)                    | Positive | [M+NH4] | 904.8328 | 15.78 | 14.50 | 13.96 |       |
|  | TG(18:0/18:0/18:0)                    | Positive | [M+NH4] | 908.8641 | 14.49 | 14.87 | 14.46 | 14.63 |

Supplemental Table S11. Enriched structural motifs for both TRAAK and TREK2 with a BEP.

| <i>Protein-Lipid Wash Sample</i> | <i>Test performed</i> | <i>Classifier</i> | <i>Count</i> | <i>Library Count</i> | <i>% Present</i> | <i>% Present in Library</i> | <i>p-value</i> | <i>Fold change</i> |
|----------------------------------|-----------------------|-------------------|--------------|----------------------|------------------|-----------------------------|----------------|--------------------|
| TREK2 CV1                        | Specific chain        | (18:1)            | 13/136       | 29/623               | 9.56             | 4.65                        | 0.0358         | 2.05               |
|                                  | Specific chain        | (16:0_20:4)       | 4/136        | 4/623                | 2.94             | 0.64                        | 0.0383         | 4.58               |
|                                  | Main class            | PS                | 6/137        | 9/582                | 4.38             | 1.55                        | 0.0478         | 2.83               |
| TREK2 CV2                        | Specific chain        | (16:0_20:4)       | 4/104        | 4/623                | 3.85             | 0.64                        | 0.0175         | 5.99               |
|                                  | Main class            | PS                | 6/106        | 9/582                | 5.66             | 1.55                        | 0.0179         | 3.66               |
|                                  | Specific chain        | (18:0_20:4)       | 3/104        | 3/623                | 2.88             | 0.48                        | 0.0411         | 5.99               |
| TREK2 CV3                        | Main class            | TG                | 24/71        | 93/582               | 33.8             | 15.98                       | 0.0008         | 2.12               |
|                                  | Main class            | FFA               | 16/71        | 59/582               | 22.54            | 10.14                       | 0.0047         | 2.22               |
|                                  | Main class            | SM                | 1/71         | 61/582               | 1.41             | 10.48                       | 0.0090         | 0.13               |
|                                  | Main class            | PC                | 10/71        | 164/582              | 14.08            | 28.18                       | 0.0103         | 0.5                |
|                                  | Subclass              | PE P-             | 8/71         | 22/582               | 11.27            | 3.78                        | 0.0107         | 2.98               |
|                                  | Specific chain        | (18:1)            | 8/61         | 29/623               | 13.11            | 4.65                        | 0.0122         | 2.82               |
|                                  | Specific chain        | (18:0_18:1)       | 3/61         | 4/623                | 4.92             | 0.64                        | 0.0182         | 7.66               |
|                                  | Chain characteristics | saturated (SFA)   | 28/61        | 194/623              | 45.9             | 31.14                       | 0.022          | 1.47               |
| TREK2 CV4                        | Main class            | FFA               | 15/66        | 59/582               | 22.73            | 10.14                       | 0.0064         | 2.24               |
|                                  | Main class            | TG                | 19/66        | 93/582               | 28.79            | 15.98                       | 0.0150         | 1.80               |
|                                  | Specific chain        | (18:1)            | 7/60         | 29/623               | 11.67            | 4.65                        | 0.0308         | 2.51               |
|                                  | Chain characteristics | saturated (SFA)   | 27/60        | 194/623              | 45               | 31.14                       | 0.031          | 1.45               |
| TRAAK CV1                        | Main class            | PC                | 17/146       | 164/582              | 11.64            | 28.18                       | 0              | 0.41               |
|                                  | Main class            | TG                | 49/146       | 93/582               | 33.56            | 15.98                       | 0              | 2.10               |
|                                  | Main class            | SM                | 1/146        | 61/582               | 0.68             | 10.48                       | 0              | 0.07               |
|                                  | Main class            | FFA               | 25/146       | 59/582               | 17.12            | 10.14                       | 0.0287         | 1.69               |
| TRAAK CV2                        | Main class            | TG                | 42/110       | 93/582               | 38.18            | 15.98                       | 0              | 2.39               |
|                                  | Main class            | PC                | 13/110       | 164/582              | 11.82            | 28.18                       | 0.0002         | 0.42               |
|                                  | Chain characteristics | saturated (SFA)   | 42/90        | 194/623              | 46.67            | 31.14                       | 0.0056         | 1.50               |
|                                  | Main class            | PS                | 7/110        | 9/582                | 6.36             |                             | 0.0070         | 4.12               |

|                       |                       |                        |        |         |         |       |        |      |
|-----------------------|-----------------------|------------------------|--------|---------|---------|-------|--------|------|
|                       | Sub-class             | PE P-                  | 11/110 | 22/582  | 10.00   | 3.78  | 0.0116 | 2.65 |
|                       | Specific chain        | 16:0_20:4              | 3/90   | 4/623   | 3.33    | 0.64  | 0.0466 | 5.19 |
| TRAAC CV3             | Main class            | PC                     | 14/119 | 164/582 | 11.76   | 28.18 | 0.0001 | 0.42 |
|                       | Main class            | TG                     | 44/119 | 93/582  | 36.97   | 15.98 | 0      | 2.31 |
|                       | Main class            | SM                     | 2/119  | 61/582  | 1.68    | 10.48 | 0.0012 | 0.16 |
|                       | Chain characteristics | saturated (SFA)        | 42/96  | 194/623 | 43.75   | 31.14 | 0.0191 | 1.40 |
|                       | Specific chain        | 18:0_20:4              | 3/96   | 3/623   | 3.13    | 0.48  | 0.0341 | 6.49 |
|                       | Sub-class             | PE P-                  | 10/119 | 22/582  | 8.40    | 3.78  | 0.0490 | 2.22 |
|                       | TRAAC CV4             | Main class             | PC     | 2/105   | 164/582 | 1.90  | 28.18  | 0    |
| Main class            |                       | FFA                    | 40/105 | 59/582  | 38.10   | 10.14 | 0      | 3.76 |
| Main class            |                       | TG                     | 41/105 | 93/582  | 39.05   | 15.98 | 0      | 2.44 |
| Main class            |                       | PE                     | 4/105  | 102/582 | 3.81    | 17.53 | 0.0001 | 0.22 |
| Main class            |                       | SM                     | 2/105  | 61/582  | 1.90    | 10.48 | 0.0043 | 0.18 |
| Specific chain        |                       | (18:0)                 | 8/70   | 21/623  | 11.43   | 3.37  | 0.0055 | 3.39 |
| Chain characteristics |                       | polyunsaturated (PUFA) | 15/70  | 219/623 | 21.43   | 35.15 | 0.0231 | 0.61 |
| Chain characteristics |                       | saturated (SFA)        | 31/70  | 194/623 | 44.29   | 31.14 | 0.0311 | 1.42 |
